# Supplementary material
Source: PubMed Central journal article supplement (PMC4115528)
Supplement: 1405500111_pnas.201405500SI.pdf [file 1405500111_pnas.201405500SI.pdf]

# Supporting Information

Port et al. 10.1073/pnas.1405500111

## SI Materials and Methods

**Cas9 Expression Plasmids.** *act-cas9*. The plasmid *pUASTattB* (a gift from Konrad Basler, University of Zurich, Zurich) was cut with HindIII and EcoRI to remove the *UAST-hsp70* cassette. The *act5c* 5' regulatory region was amplified with primers *act5c fwd/rev* from *pAct5c > CD2 > Gal4* (a gift from Silvia Aldaz, Medical Research Council Laboratory of Molecular Biology, Cambridge, United Kingdom) and cloned into the open backbone from the previous step, creating *pAct5cattB*. *pAct5cattB* was cut with EcoRI and XhoI, followed by insertion of a human codon-optimized Cas9 coding sequence including a nuclear localization signal that was amplified from Addgene plasmid 41815 (1) using primers *hCas9Add41815 fwd/rev*. The resulting plasmid was termed "*pAct5c-cas9*."

**act-cas9<sup>D10A</sup>**. To create a nickase version of Cas9, aspartic acid 10 in one of the active sites was mutated to alanine (2). *Cas9<sup>D10A</sup>* was amplified from *pAct5c-cas9* with primers *act-cas9nick fwd/rev*. The forward primer introduced the point mutation into the PCR product, which was inserted into *pAct5c-cas9* that had been digested with EcoRI.

**nos-cas9**. The plasmid *pUASTattB* was cut with BamHI to remove the *UAST-hsp70-SV40* 3' UTR cassette. The *nos* regulatory regions were amplified with primers *nosProm fwd/rev* and *nos3' fwd/rev* from *pNos-PhiC31* (a gift from Konrad Basler). The Cas9 coding sequence with an SV40 nuclear localization signal was amplified from plasmid Addgene 41815 (1) using primers *hCas9Add41815 fwd2/rev2*. The final plasmid was assembled in a four-fragment Gibson reaction to yield *pnos-cas9*.

**nos-cas9:GFP**. The plasmid was created in the same way as *pnos-cas9*, except that the Cas9 coding region fused to a sequence encoding GFP and two nuclear localization signals was amplified from Addgene plasmid 42234 [which contains a different human codon optimized version to plasmid 41815 (3)] with primers *hCas9Add42234 fwd/rev*.

**UAS-cas9 (for CFD3 and 4)**. The coding sequence of *Streptococcus pyogenes* Cas9 was codon-optimized for expression in *Drosophila* using the online tool from Integrated DNA Technologies (IDT), followed by addition of sequence coding for the nuclear localization signal of the *Drosophila* UDE1 protein (4) to the 3' end. The DNA sequence was ordered as gBlocks from IDT with 30-bp overlapping homologies between fragments and was constructed by Gibson assembly. The *cas9* sequence was amplified from the assembled gBlocks using primers *DmCas9pJFRC81 fwd/rev* and cloned into the KpnI/XbaI site of *pJFRC81* (Addgene 36432) (5) using conventional T4 DNA ligase-mediated cloning. The sequence provided by *pJFRC81* includes the 3' UTR from the *Autographa californica* nuclear polyhedrosis virus *p10* gene, which acts as a strong translational enhancer.

**UAS-cas9 (for CFD5 and 6)**. A *Drosophila* codon-optimized *cas9* with N- and C-terminal nuclear localization signal was cloned into *pJFRC28* (Addgene 36431) (5), using the KpnI and XbaI restriction sites. The Cas9 cDNA was a gift from Justin Crocker (David Stern laboratory, Howard Hughes Medical Institute, Janelia Farm Research Campus, Ashburn, VA).

**Guide RNA Expression Plasmids.** The sequence encoding the three *Drosophila* *U6* genes (based on Flybase release FB2013\_04) with the *U6* RNA sequences replaced by guide RNA (gRNA) core sequences (Table S5) was synthesized by IDT. The sequence starts with 5'-ATTTTCAACGTCCTCGATAG and ends with TTCGCTTAATGCGTATGCAT-3'. This construct is referred to as "*3xU6-gRNA*" and served as the PCR template for the

cloning of the individual gRNA expression plasmids. The backbone of the individual *pCFD* gRNA vectors, containing an *attB* site, a *vermilion* eye pigmentation marker, and an Ampicillin resistance gene, was PCR amplified from *pValium22* (a gift from Norbert Perrimon, Harvard University, Cambridge, MA) using primers *pCFDbackbone fwd/rev*.

**pCFD1, 2, and 3.** *pCDF1*, *pCDF2*, and *pCDF3* contain, respectively, the *U6:1*, *U6:2*, and *U6:3* promoters. Each promoter was amplified from the *3xU6-gRNA* construct using a specific *U6 prom fwd/rev* primer pair. These promoter sequences were assembled together with the gRNA core and genomic 3' region amplified from the *3xU6-gRNA* construct with *gRNAterm fwd/rev* and the *pCFD* backbone.

**pCFD4.** The double gRNA vector was produced by amplifying a *BbsI spacer-gRNA-U6-3 promoter* fragment from the *3xU6-gRNA* construct using *pCFD4 fwd/rev* primers and cloning it into *pCFD1* that had been digested with *BbsI*.

*pCFD1-3* allow cloning of annealed complementary oligonucleotides into the *BbsI*-digested backbone using standard procedures to produce the following 5'-to-3' configuration: *U6 promoter-gRNA target sequence-gRNA core sequence*. Two gRNA target sites can be introduced into *pCDF4* by a simple PCR-based method. Cloning procedures for *pCFD1-4* are documented in further detail in Fig. S3. The four gRNA expression vectors, together with their sequences, are available at [www.addgene.org](http://www.addgene.org) (*pCDF1*, Addgene no. 49408; *pCDF2*, Addgene no. 49409; *pCDF3*, Addgene no. 49410; *pCDF4*, Addgene no. 49411). Most gRNA target sites used in this study were cloned into earlier versions of the *pCFD* backbone containing a *white* marker gene using Gibson assembly, except for *gRNA-e gRNA-cu* and *gRNA-y<sup>offset</sup>*, which were generated in *pCFD4*. We confirmed that gRNA plasmids containing *white* or *vermilion* marker genes function with comparable efficiency.

**gRNA Design.** Target sites were designed so that they direct Cas9-mediated cleavage to the 5' end of the coding sequence, except for *gRNA-wg<sup>P1-3</sup>*, which targets the promoter. To reduce the risk of off-target cleavage, target sites were chosen that do not have highly homologous sites elsewhere in the genome. Off-target potential was assessed using CRISPR target finder (<http://tools.flycrispr.molbio.wisc.edu/targetFinder/>) (6) or E-CRISPR ([www.e-crisp.org/E-CRISP/](http://www.e-crisp.org/E-CRISP/)) (7). Because a 5' guanine is required for transcription from *U6* promoters, target sites that lack this feature were extended in the 5' direction by a single guanine. The 5' extensions do not appear to affect gRNA function (8).

**Wg::GFP Donor Plasmid Production.** The 5' and 3' homology arms were PCR amplified from genomic DNA from *nos-cas9* flies using primers *wgGFP5' fwd*, *wgGFP5' rev*, *wgGFP3' fwd*, and *wgGFP3' rev*. The eGFP coding sequence flanked by sequences coding for short linker peptides from Ig G2 were amplified from an eGFP-containing plasmid (S.L.B. laboratory stock) using primers *wgGFPGFP fwd* and *wgGFPGFP rev*. The sequences of all primers as well as the sequence encoding the linkers can be found in Table S5. All fragments were assembled by Gibson assembly into pBluescript SK-(+) (Stratagene) that was digested with *XhoI* and *NotI*.

**Fly Transgenesis and Culture.** Transgenic lines were generated by standard *PhiC31*-integrase-mediated transformation using injected DNA constructs (9). The *attP* integration sites used for different experiments are documented in Tables S1 and S2.

Other stocks used and their sources are listed in Table S6. All crosses were performed at 25 °C with 50 ± 5% relative humidity and a 12-h light/dark cycle.

**Embryo Injections.** Embryos were collected on apple juice plates for 30 min at 25 °C, briefly rinsed with tap water, and dechorionated for 60 s in 6% sodium hypochlorite. After extensive washing with tap water, embryos were lined up on apple agar plates with a paintbrush, transferred to a coverslip coated in heptane glue, and desiccated for 5–8 min in a box containing silica gel. Embryos were covered in Voltalef 10S oil (VWR International) and transferred to a Nikon Eclipse microscope equipped with a manual micromanipulator (Narishige). DNA was microinjected in the proximity of the posterior pole of embryos using a heat-pulled glass needle (Microcaps, Drummond) attached to an air-filled 20-mL syringe. All injections were performed at 22 ± 1 °C, with typically 50–100 embryos injected 45–60 min after egg-laying. For the delivery of plasmid DNA for the production of transgenes, 150 ng/μL of DNA in sterile dH<sub>2</sub>O was injected. Single-stranded oligonucleotides designed to modify the *wntless* (*wls*) or *ebony* (*e*) locus (ordered as 4-nM Ultramers from IDT) were injected into the posterior region of *nos-cas9/+; U6:3-gRNA-wls/+* or *act-cas9/+; U6:3-gRNA-e/+* embryos, respectively, as a 750-ng/μL or 500-ng/μL solution of DNA in dH<sub>2</sub>O. Plasmid DNA that acts as a donor template for homologous recombination-mediated integration of eGFP into the *wg* locus was injected at a concentration of 750 ng/μL into *nos-cas9/+; U6:3-gRNA-wg/+* embryos. After injection of plasmids or oligonucleotides, embryos were transferred on their coverslips to a plastic box containing wet paper towel at 25 °C until they hatched as larvae. Larvae were collected with forceps and transferred to a food vial with fresh yeast, followed by culture at 25 °C.

**Immunohistochemistry and Visualization of GFP Fluorescence.** Wing imaginal discs from third-instar larvae were dissected in chilled PBS. Fixation was performed in 4% paraformaldehyde in PBS containing 0.3% Triton-X100 (PBT) for 25 min at room temperature. After three washings with PBT, discs were incubated overnight at 4 °C with primary antibodies diluted in PBT. Imaginal discs subsequently were washed three times with PBT containing 1% heat-inactivated goat serum for at least 1 h, followed by incubation in secondary antibodies diluted in PBT for 2 h at room temperature. Samples were washed three times in

PBT and mounted in Vectashield medium containing DAPI (Vector Laboratories). Antibodies used were polyclonal rabbit anti-Wntless (anti-Wls) (1:1,000) (10), monoclonal mouse anti-Wingless (anti-Wg) (4D4; 1:50; Developmental Studies Hybridoma Bank), Alexa Fluor 488 goat anti-mouse (1:400; Invitrogen) and Alexa Fluor 555 goat anti-rabbit (1:400; Invitrogen). Discs were prepared for visualization of Wg::GFP fluorescence by fixation in 4% paraformaldehyde for 25 min, followed by three washes for 5 min each in PBT and mounting in Vectashield.

*Drosophila* embryos were collected on apple agar plates and dechorionated for 90 s in 6% sodium hypochlorite. They were fixed for 20 min at room temperature on an orbital shaker in glass vials containing 2 mL n-heptane and 1 mL 4% paraformaldehyde (in PBS) that had been mixed and allowed to phase separate. The paraformaldehyde subsequently was replaced with 3 mL methanol, and the vitelline membrane was removed by vigorous shaking. Embryos were rinsed three times in methanol, resuspended in PBT, and immunostained following the protocol used for wing imaginal discs.

**Cuticle Preparations.** *Drosophila* embryos were dechorionated as describe above and transferred to glass vials containing 2 mL n-heptane and 3 mL methanol that had been mixed and allowed to phase separate. The vitelline membrane then was removed by vigorous shaking. Embryos were washed with methanol and transferred to microscope slides. Excess methanol was removed, and embryos were covered in Hoyer's solution. Slides were incubated for at least 2 h at 60 °C before imaging.

**Image Acquisition.** Images of whole flies were captured on a Canon 550D digital camera equipped with a Canon 50-mm f1.8 lens mounted on a Leica MZFLIII stereomicroscope. Manual settings were used throughout, and the lighting was kept constant during image acquisition. Flies presented within the same figure were imaged on the same day. Before imaging, flies were incubated overnight in 20% glycerol/80% ethanol and on the next day were mounted in 100% glycerol. Adult wings were mounted in 100% glycerol and imaged on a Zeiss Axioplan microscope equipped with a CoolSnap HQ2 camera (Photometrics). Fluorescent images of wing imaginal discs and embryos were acquired on a Zeiss LSM710 or LSM780 confocal microscope using the sequential scanning mode and a 40×/1.3 NA oil or 20×/0.5 NA air objective.

1. Mali P, et al. (2013) RNA-guided human genome engineering via Cas9. *Science* 339(6121):823–826.
2. Jinek M, et al. (2012) A programmable dual-RNA-guided DNA endonuclease in adaptive bacterial immunity. *Science* 337(6096):816–821.
3. Jinek M, et al. (2013) RNA-programmed genome editing in human cells. *eLife* 2:e00471.
4. Merényi G, Kónya E, Vértessy BG (2010) *Drosophila* proteins involved in metabolism of uracil-DNA possess different types of nuclear localization signals. *FEBS J* 277(9):2142–2156.
5. Pfeiffer BD, Truman JW, Rubin GM (2012) Using translational enhancers to increase transgene expression in *Drosophila*. *Proc Natl Acad Sci USA* 109(17):6626–6631.
6. Gratz SJ, et al. (2014) Highly specific and efficient CRISPR/Cas9-catalyzed homology-directed repair in *Drosophila*. *Genetics* 196(4):961–971.
7. Heigwer F, Kerr G, Boutros M (2014) E-CRISP: Fast CRISPR target site identification. *Nat Methods* 11(2):122–123.
8. Ran FA, et al. (2013) Double nicking by RNA-guided CRISPR Cas9 for enhanced genome editing specificity. *Cell* 154(6):1380–1389.
9. Bischof J, Maeda RK, Hediger M, Karch F, Basler K (2007) An optimized transgenesis system for *Drosophila* using germ-line-specific phiC31 integrases. *Proc Natl Acad Sci USA* 104(9):3312–3317.
10. Port F, et al. (2008) Wingless secretion promotes and requires retromer-dependent cycling of Wntless. *Nat Cell Biol* 10(2):178–185.
11. Fu Y, Sander JD, Reyon D, Cascio VM, Joung JK (2014) Improving CRISPR-Cas nuclease specificity using truncated guide RNAs. *Nat Biotechnol* 32(3):279–284.
12. Neumann CJ, Cohen SM (1997) Long-range action of Wingless organizes the dorsal-ventral axis of the *Drosophila* wing. *Development* 124(4):871–880.
13. Baena-Lopez LA, Alexandre C, Mitchell A, Pasakarnis L, Vincent J-P (2013) Accelerated homologous recombination and subsequent genome modification in *Drosophila*. *Development* 140(23):4818–4825.

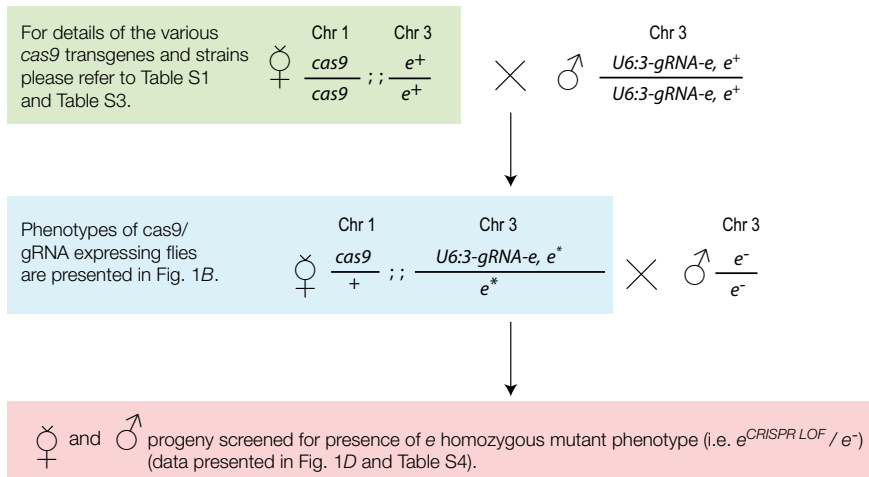

**Fig. S1.** General crossing scheme used to compare the efficiency of various *cas9* strains in the soma and germ line. Only relevant genetic elements are shown (full genotypes of *cas9* and *gRNA* strains are listed in Table S3). Note that some *cas9* transgenes are located on the third chromosome along with a wild-type *e* allele. A similar crossing scheme was followed to assess targeting of the *y* gene (i.e., flies containing the *cas9* and *U6:3-gRNA-y* transgenes were crossed to a *y* mutant strain). Chr, chromosome; *CRISPR-LOF*, loss-of-function CRISPR allele.

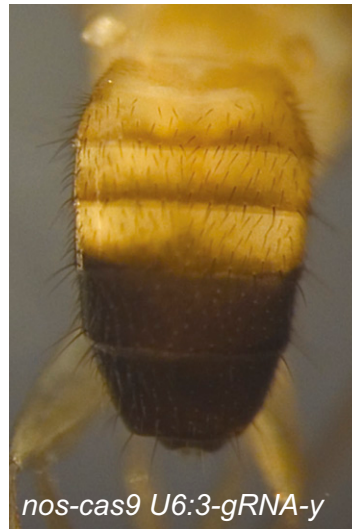

**Fig. S2.** Further evidence that the *nos-cas9* transgene lacks detectable activity when crossed to *U6:3-gRNA-y*. A *nos-cas9 U6:3-gRNA-y* male is shown that inherited a single, wild-type *y* allele. No yellow cuticle is observed, indicating that this allele is not mutated in cells giving rise to cuticle.

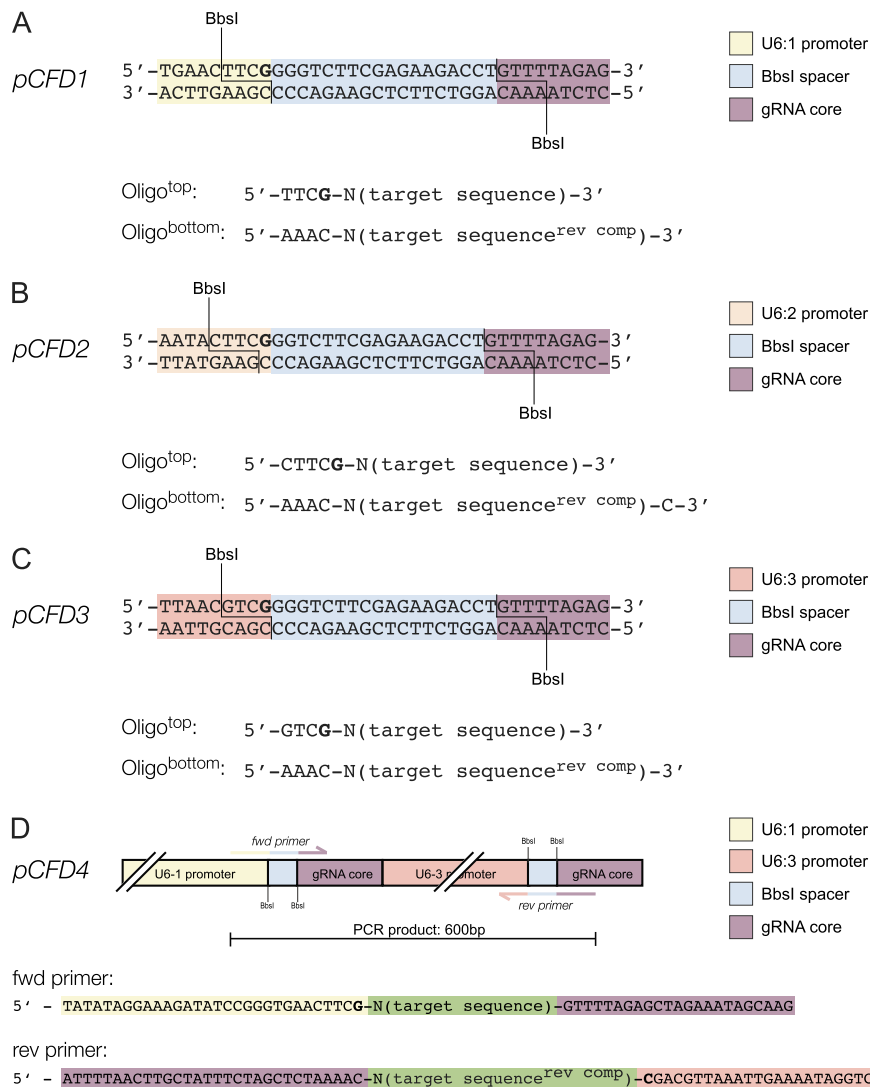

**Fig. S3.** Cloning strategies to introduce gRNA target sites into *pCFD* vectors. (A–C) Plasmids *pCFD1* (A), *pCFD2* (B), and *pCFD3* (C) contain two inverted type-IIIS BbsI restriction sites to allow seamless cloning of target sites. The BbsI cassette can be replaced by the desired target sequence by digesting the plasmid backbone with BbsI and ligating the linear backbone to annealed oligonucleotides with compatible ends (schematized below each cloning site). The G in bold is the first nucleotide that is transcribed and is necessary for transcription from U6 promoters. If the target site has a 5' G, then the target sequence to be introduced will be 19 nt long; otherwise, the target sequence will be 20 nt long. There is evidence from mammalian cells that shorter target sequences can be tolerated and can increase the specificity of CRISPR/Cas (11). Note that the BbsI cassette in *pCFD2* (B) is truncated by 1 bp, making it necessary to add a 3' cytosine to the bottom-strand oligonucleotide. (D) Cloning strategy to introduce two target sites into the tandem gRNA vector *pCFD4*. Target sites are incorporated into the forward and reverse primers, which also contain 3' homology to the *pCFD4* backbone to allow PCR amplification, and 5' homology to the *pCFD4* backbone to allow homology-directed cloning. PCR products are cloned into the BbsI-digested *pCFD4* backbone by homology-directed cloning (e.g., Gibson assembly).

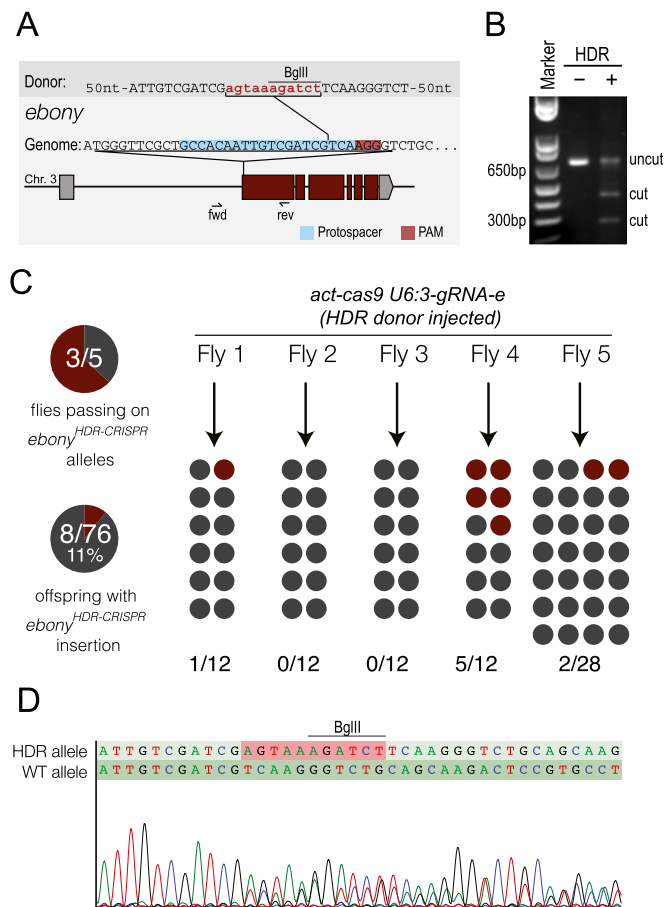

**Fig. 54.** Efficient incorporation of an exogenous sequence by homology-directed repair (HDR) into the *e* locus following Cas9-induced DSBs. (A) Schematic of the donor DNA in relation to the gRNA target site at the *e* locus. The donor was a single-stranded oligonucleotide with 60-nt homology to the target locus at either side of the Cas9 cut site and an 11-nt insert (lowercase). This insert introduces an in-frame stop codon (TAA) and a BglII restriction site. The locations of the primers used for the genotyping PCR in *B* are shown below the schematic of the genomic locus. Donor DNA was injected into embryos that were the progeny of *act-cas9* females and *U6:3-gRNA-e* males. (B) Successful integration of the donor construct could be detected in the offspring of injected embryos by BglII digestion of PCR products. Agarose gel showing pattern observed in the absence (–) and presence (+) of the HDR. The 700-nt fragment present in both samples is derived from the wild-type *e* locus transmitted by the other parent. (C) Summary of results from screening flies for HDR events by PCR and restriction digest. Note that flies that developed from injected embryos were selected at random, i.e., without consideration for their pigmentation phenotype. (D) Sequence verification of the precise integration of the donor DNA in the *e* locus by direct sequencing of a PCR product amplified from a heterozygous fly that tested positive by BglII restriction digest. Double peaks in the chromatogram represent an overlay of the sequence of the mutant and wild-type *e* alleles.



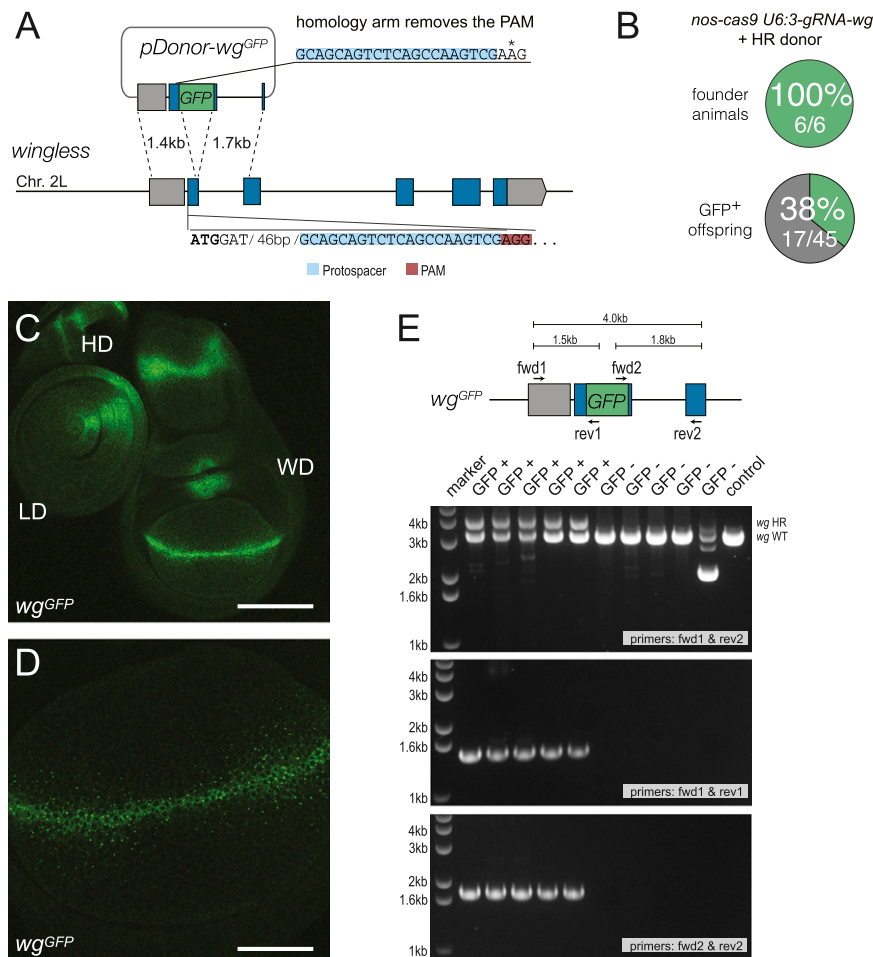

**Fig. 55.** Efficient integration of a GFP tag into the endogenous *wg* locus by homologous recombination (HR) using *nos-cas9* and *U6:3-gRNA-wg*. (A) Schematic of the donor plasmid, *wg* locus, and *gRNA-wg* target sequence. The donor is designed to introduce an eGFP-coding sequence flanked on either side by sequences coding for a short linker peptide from IgG into the first coding exon of *wg*. The exogenous sequence is flanked by homology arms of 1.4 kb (5' homology) and 1.7 kb (3' homology). The 5' homology arm contains a synonymous mutation that removes the protospacer-adjacent motif (PAM) sequence for *gRNA-wg* to prevent mutagenesis after the integration of donor-derived sequences. The circular donor plasmid was injected into *nos-cas9 U6:3-gRNA-wg* embryos. (B) Injected animals were crossed to a balancer strain, and offspring were screened at the third-instar larval stage for the appearance of green fluorescence in dissected imaginal discs. All six injected animals tested gave rise to GFP<sup>+</sup> offspring, with 17 of the 45 larvae examined showing GFP expression. In all cases GFP expression was restricted to the Wg-expression domain. In the six crosses, two of nine larvae, six of 11 larvae, three of five larvae, one of five larvae, three of eight larvae, and two of seven larvae were GFP<sup>+</sup>. (C and D) Images showing examples of GFP<sup>+</sup> imaginal discs. Each image is a single confocal section. (C) Low-magnification image showing GFP fluorescence in the Wg expression domains of a wing (WD), leg (LD), and part of a haltere (HD) imaginal disc. (Scale bar: 150 μm.) (D) A high-magnification view of GFP fluorescence at the dorsal-ventral boundary of a wing imaginal disc. In addition to strong signal from a stripe of three to four cells, punctate signal is found more distally from this site. This pattern is reminiscent of that observed when endogenous Wg protein is detected using a specific anti-Wg antibody (12). (Scale bar: 50 μm.) (E) Diagnostic PCR to test for ends-out HR of the donor plasmid in offspring of *nos-cas9 U6:3-gRNA-wg* embryos injected with the *Wg::GFP* donor plasmid. After examination of GFP fluorescence in imaginal discs, genomic DNA was extracted from the remaining material of 10 of the dissected larvae. Five of these larvae had GFP<sup>+</sup> imaginal discs, and five had GFP<sup>-</sup> discs. DNA also was extracted from a *nos-cas9* larva, which served as a negative control. PCRs were performed using the primers indicated in the schematic. Note that primers *rev1* and *fwd2* do not anneal to the wild-type *wg* locus. Primers *fwd1* and *rev2* are located outside the homology arms and thus do not anneal to sequences in the donor plasmid. All larva with GFP<sup>+</sup> discs tested positive for integration of the GFP sequence at the *wg* locus; the presence of the 4-kb band from all these larvae using *fwd1* and *rev2* primers demonstrates ends-out targeting (i.e., in which the plasmid backbone is not incorporated) of one of the alleles. One of the GFP<sup>-</sup> larvae yielded a much shorter band with primers *fwd1* and *rev2*, suggesting a large (~1 kb) CRISPR/Cas-induced deletion. This product presumably amplified more efficiently than the product from the wild-type allele because of its relatively small size.

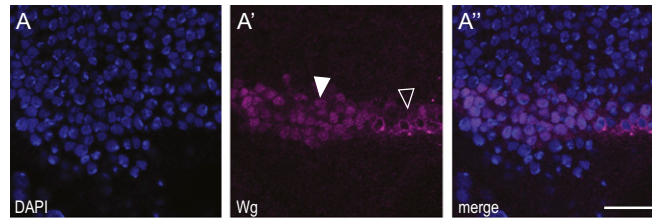

**Fig. S6.** Mutations at the *gRNA-wg* target site can relocate Wg to the nucleus. A high-magnification view of a third-instar wing imaginal disc from a *cas9 gRNA-wg*-expressing animal is shown. A presumptive clone of cells with Wg (Wg protein in magenta in A' and A'') mislocalized to the nucleus (DNA in blue in A and A'') is shown (solid arrowhead) next to tissue that retains wild-type Wg localization (open arrowhead). This image is from a different animal from the one shown in Fig. 5C. (Scale bar: 20  $\mu$ m).

**Table S1. Transgenic Cas9 lines used in this study**

| Name                                                                                                                                                              | Promoter/3' UTR              | Cas9 coding sequence <sup>*†</sup> | Integration site of <i>cas9</i> construct (chromosome) | Stock numbers                   |
|-------------------------------------------------------------------------------------------------------------------------------------------------------------------|------------------------------|------------------------------------|--------------------------------------------------------|---------------------------------|
| Stocks generated in this study. ( <a href="http://www.crisprflydesign.org">www.crisprflydesign.org</a> )                                                          |                              |                                    |                                                        |                                 |
| <i>act-cas9</i>                                                                                                                                                   | <i>act5C/SV40</i>            | Hs_Cas9 (Addgene: 41815)           | attP-ZH2a (X)                                          | CFD1 BL:54590 VDRC: 300000      |
| <i>act-cas9<sup>D10A</sup></i>                                                                                                                                    | <i>act5C/SV40</i>            | Hs_Cas9 (Addgene: 41815)           | attP2 (3L)                                             | VDRC: 300008                    |
| <i>nos-cas9:GFP</i>                                                                                                                                               | <i>nos/nos<sup>‡</sup></i>   | Hs_Cas9:GFP (Addgene: 42234)       | attP-ZH2a (X)                                          | N/A                             |
| <i>nosG4VP16 UAS-cas9<sup>§</sup></i>                                                                                                                             | <i>nos(Gal4/UAS)/p10</i>     | Dm-Cas9                            | attP2 (3L)                                             | CFD3_nos BL: 54593 VDRC: 300003 |
| <i>nos-cas9</i>                                                                                                                                                   | <i>nos/nos<sup>‡</sup></i>   | Hs_Cas9 (Addgene:41815)            | attP-ZH2a (X)                                          | CFD2 BL:54591 VDRC: 300001      |
| <i>UAS-cas9</i>                                                                                                                                                   | <i>UAS/p10</i>               | Dm_Cas9 <sup>¶</sup>               | attP2 (3L)                                             | CFD3 BL: 54592 VDRC: 300002     |
| <i>UAS-cas9</i>                                                                                                                                                   | <i>UAS/p10</i>               | Dm_Cas9 <sup>¶</sup>               | attP2 (3L)                                             | CFD5 BL: 54595 VDRC: 300005     |
| Stocks generated by O'Connor-Giles, Harrison, and Wildonger laboratories ( <a href="http://www.flycrispr.molbio.wisc.edu">www.flycrispr.molbio.wisc.edu</a> ) (6) |                              |                                    |                                                        |                                 |
| <i>vasa-cas9</i>                                                                                                                                                  | <i>vasa/vasa<sup>‡</sup></i> | Hs_Cas9 (Addgene:42230)            | attP-ZH2a (X)                                          | BL:51323                        |
| <i>vasa-cas9</i>                                                                                                                                                  | <i>vasa/vasa<sup>‡</sup></i> | Hs_Cas9 (Addgene:42230)            | attP-VK00027 (3R)                                      | BL:51324                        |

*act*, *actin5C*; BL, Bloomington *Drosophila* Stock Center; Dm, *Drosophila melanogaster*; Hs, *Homo sapiens*; N/A, not applicable; *nos*, *nanos*; VDRC, Vienna *Drosophila* RNAi Center.

<sup>\*</sup>Species refers to codon optimization; all constructs express *Streptococcus pyogenes* Cas9 protein.

<sup>†</sup>*cas9* constructs contain different nuclear localization signals (NLS): Hs\_Cas9 (Addgene: 41815) contains a single SV40 NLS; Hs\_Cas9 (Addgene: 42234) contains two NLS based on the SV40 NLS; Dm\_Cas9 has one Ude1 NLS (4).

<sup>‡</sup>*nos* and *vasa* 3' UTRs are designed to target protein synthesis to the germ cells.

<sup>§</sup>*UAS-cas9* from strain CFD3.

<sup>¶</sup>Lines CFD3 and CFD5 have different codon optimization.

**Table S2. Transgenic gRNA lines used in this study**

| gRNA line                                    | Integration site |
|----------------------------------------------|------------------|
| <i>U6:3-gRNA-y<sup>*</sup></i>               | attP2            |
| <i>U6:1-gRNA-y<sup>†</sup></i>               | attP40           |
| <i>U6:2-gRNA-y<sup>†</sup></i>               | attP40           |
| <i>U6:3-gRNA-y<sup>†</sup></i>               | attP40           |
| <i>U6:3-gRNA-e</i>                           | attP2            |
| <i>U6:3-gRNA-wls</i>                         | attP40           |
| <i>U6:3-gRNA-wg</i>                          | attP40           |
| <i>U6:1-U6:2-U6:3-gRNA-wg<sup>P1-3</sup></i> | attP2            |
| <i>U6:1-gRNA-e U6:3-gRNA-cu</i>              | attP2            |

<sup>\*</sup>Used to target *y* in Fig. 1.

<sup>†</sup>Used to target *y* in Fig. 2.

**Table S3. Crosses comparing various Cas9 lines in Fig. 1**

| Virgin females                                                           | Males*                                                    | WT y alleles in F1 females/ males | WT e alleles in F1 females/ males | Expected frequency of <i>y</i> <sup>[-]</sup> flies in F2 <sup>†</sup> , % |
|--------------------------------------------------------------------------|-----------------------------------------------------------|-----------------------------------|-----------------------------------|----------------------------------------------------------------------------|
| <i>y</i> [1] <i>act-cas9</i> <sup>ZH-2A</sup>                            | <i>w</i> <i>f</i> ; <i>U6:3-gRNA</i> <sup>attP2, y+</sup> | 2/1                               | 2/2                               | 25                                                                         |
| <i>y</i> [1] <i>vasa-cas9</i> <sup>ZH-2A</sup>                           | <i>w</i> <i>f</i> ; <i>U6:3-gRNA</i> <sup>attP2, y+</sup> | 2/1                               | 2/2                               | 25                                                                         |
| <i>w</i> ; <i>vasa-cas9</i> <sup>VK00027, y+</sup>                       | <i>w</i> <i>f</i> ; <i>U6:3-gRNA</i> <sup>attP2, y+</sup> | 4/3                               | 2/2                               | 0                                                                          |
| <i>y</i> [1] <i>nos-cas9:GFP</i> <sup>ZH-2A</sup>                        | <i>w</i> <i>f</i> ; <i>U6:3-gRNA</i> <sup>attP2, y+</sup> | 2/1                               | 2/2                               | 25                                                                         |
| <i>y</i> [1]; <i>UAS-cas9</i> <sup>attP2, y+</sup> <i>nos-Gal4::VP16</i> | <i>w</i> <i>f</i> ; <i>U6:3-gRNA</i> <sup>attP2, y+</sup> | 3/2                               | 2/2                               | 0                                                                          |
| <i>y</i> [1] <i>nos-cas9</i> <sup>ZH-2A</sup>                            | <i>w</i> <i>f</i> ; <i>U6:3-gRNA</i> <sup>attP2, y+</sup> | 2/1                               | 2/2                               | 25                                                                         |

\*gRNA transgenes contain either the *y* or *e* target site (see Table S5 for sequences).

<sup>†</sup>In the absence of CRISPR/Cas mutagenesis. Note that no *e* mutant animals are expected in the *gRNA-e* experiments without CRISPR/Cas mutagenesis.

**Table S4. Collated results of experiments assessing germ-line transmission of loss-of-function mutations in *e* and *y* using fully transgenic CRISPR/Cas**

| Cas9 line                                                                                            | % founders* (#) | % phenotypically mutant offspring per cross, mean ± SEM | No. of phenotypically mutant offspring (total) |
|------------------------------------------------------------------------------------------------------|-----------------|---------------------------------------------------------|------------------------------------------------|
| Targeting <i>e</i> with <i>cas9</i> and <i>U6:3-gRNA-e</i> (data presented in Fig. 1D)               |                 |                                                         |                                                |
| <i>act-cas9</i>                                                                                      | 100 (10/10)     | 54 ± 3 <sup>†</sup>                                     | 613 (1,116) <sup>‡</sup>                       |
| <i>vasa-cas9</i> on <i>X</i>                                                                         | 100 (9/9)       | 52 ± 4 <sup>†</sup>                                     | 534 (1,002) <sup>‡</sup>                       |
| <i>vasa-cas9</i> on <i>3</i>                                                                         | 100 (9/9)       | 48 ± 3 <sup>†</sup>                                     | 627 (1,379) <sup>‡</sup>                       |
| <i>nos-cas9:GFP</i>                                                                                  | 100 (10/10)     | 42 ± 3 <sup>†</sup>                                     | 611 (1,409) <sup>‡</sup>                       |
| <i>nosG4VP16 UAS-cas9</i>                                                                            | 100 (9/9)       | 46 ± 6 <sup>†</sup>                                     | 426 (887) <sup>‡</sup>                         |
| <i>nos-cas9</i>                                                                                      | 100 (8/8)       | 26 ± 3 <sup>†</sup>                                     | 290 (1,109) <sup>‡</sup>                       |
| Targeting <i>y</i> with <i>cas9</i> and <i>U6:3-gRNA-y</i> (data presented in Fig. 1E)               |                 |                                                         |                                                |
| <i>act-cas9</i>                                                                                      | 100 (10/10)     | 99 ± 0.4 <sup>‡</sup>                                   | 762 (767)                                      |
| <i>vasa-cas9</i> on <i>X</i>                                                                         | 100 (5/5)       | 100 ± 0 <sup>‡</sup>                                    | 149 (149)                                      |
| <i>vasa-cas9</i> on <i>3</i>                                                                         | 100 (10/10)     | 86 ± 2 <sup>‡</sup>                                     | 670 (779)                                      |
| <i>nos-cas9:GFP</i>                                                                                  | 100 (10/10)     | 71 ± 3 <sup>‡</sup>                                     | 612 (781)                                      |
| <i>nosG4VP16 UAS-cas9</i>                                                                            | 100 (4/4)       | 83 ± 7 <sup>‡</sup>                                     | 244 (315)                                      |
| <i>nos-cas9</i>                                                                                      | 100 (7/7)       | 76 ± 6 <sup>‡</sup>                                     | 299 (368)                                      |
| Comparing <i>U6</i> promoters driving <i>gRNA-y</i> with <i>nos-cas9</i> (data presented in Fig. 2C) |                 |                                                         |                                                |
| <i>U6</i> promoter <sup>§</sup>                                                                      |                 |                                                         |                                                |
| <i>U6:1</i>                                                                                          | 100 (3/3)       | 69 ± 1 <sup>‡</sup>                                     | 278 (359)                                      |
| <i>U6:2</i>                                                                                          | 100 (3/3)       | 41 ± 3 <sup>‡</sup>                                     | 351 (595)                                      |
| <i>U6:3</i>                                                                                          | 100 (3/3)       | 99 ± 0.3 <sup>‡</sup>                                   | 410 (412)                                      |

\*Founders are defined as those flies that transmitted nonfunctional alleles to the next generation.

<sup>†</sup>Phenotypic screening for *e* mutant alleles does not account for in-frame mutations at the *gRNA-e* target site that do not disrupt gene function.

<sup>‡</sup>Data are normalized to account for phenotypically yellow mutant offspring that arise because of the genetic background (*Materials and Methods*).

<sup>§</sup>*U6-gRNA-y* constructs are inserted at attP40 in this experiment; *U6:3-gRNA-y* is inserted at attP2 in the data presented in Fig. 1E.



**Table S5. Oligonucleotides and gRNA target sites used in this study**

|                                   |                                                                                                                                       |
|-----------------------------------|---------------------------------------------------------------------------------------------------------------------------------------|
| Primers used for cloning (5'-3')  |                                                                                                                                       |
| act5c fwd                         | ATACGAAGTTATGCTAGCGGATCCAAGCTTGCGGCCGCAATTCTATATTC                                                                                    |
| act5c rev                         | AGCCCGCGCCGAGATCTGTTAACGAATTCGGGGATCGATCCTGTAAGC                                                                                      |
| hCas9Add41815fwd                  | CAGCTTACAGGATCGATCCCCGGGAATTCaccATGGACAAGAAGTACTC                                                                                     |
| hCas9Add41815rev                  | TCACAAAGATCCTCTAGAGGTACCCTCGAGTCACACCTTCTCTTCTTCT                                                                                     |
| act-cas9nickfwd                   | GCAGCTTACAGGATCGATCCCCGGGAATTCACCATGGACAAGAAGTACTCCATTGGGCTCGCTATCGGCACAAACAG                                                         |
| act-cas9nickrev                   | TTAGCGTCGCGGAGGATCACTC                                                                                                                |
| nosPromfwd                        | TATGCTATACGAAGTTATGCTAGCGGATCCAAGCTTCGACCGTTTTTAACC                                                                                   |
| nosPromrev                        | GAGTACTTCTTGTCATGGCGAAAAATCCGGGTCGAAA                                                                                                 |
| nos3' fwd                         | GAAGAGGAAGGTGTGAGCGAATCCAGCTCTGGAGCA                                                                                                  |
| nos3' rev                         | GTGACCTACATCGTCGACACTAGTGGATCCTTCTCGGCCCTTTTCGAGAA                                                                                    |
| hCas9Add41815fwd2                 | GACCCGGATTTTCGCCATGGACAAGAAGTACTCCAT                                                                                                  |
| hCas9Add41815rev2                 | CCAGAGCTGGATTGCTCACACCTTCTCTTCTTCT                                                                                                    |
| hCas9Add42234fwd                  | GACCCGGATTTTCGCCATGGACAAGAAGTACAGCAT                                                                                                  |
| hCas9Add42234rev                  | CCAGAGCTGGATTGCTCTACTTGTACAGCTCGTCCA                                                                                                  |
| DmCas9pJFRC81fwd                  | GAGGGTACCAACTTAAAAAAAAAATCAAATGGATAAGAAGTATAGCAT                                                                                      |
| DmCas9pJFRC81rev                  | GTATCTAGATTACTCCTGCTTGCGCTTCT                                                                                                         |
| gRNA core                         | GTTTTAGAGCTAGAAATAGCAAGTTAAATAAAGGCTAGTCCGTTATCAACTTGAAAAAGTGGCACCGAGTCGGTGTCTTTT                                                     |
| pCFDbackbonefwd                   | ATAAAATACATTGCATAGATCTGAATTCATCTAGACTCCCTCGTGCCTCTCCTG                                                                                |
| pCFDbackbonerev                   | GATAGAATTCAGATCTATGCAATGATTTTATTAATAAACCG                                                                                             |
| U61promfwd                        | CGTTTTTAATAAAATACATTGCATAGATCTGAATTCATTTTCAACGTCCTCGATAGTA                                                                            |
| U61promrev                        | TATTTTAACTTGCTATTTCTAGCTCTAAACAGGCTTCTCGAAGACCCCGAAGTTCACCCGGATATCTT                                                                  |
| U62promfwd                        | CGTTTTTAATAAAATACATTGCATAGATCTGAATTCGTTTCGACTTGCAGCCTGAAA                                                                             |
| U62promrev                        | TTTCTAGCTCTAAACAGGCTTCTCGAAGACCCCGAAGTATTGAGGAAAACATAC                                                                                |
| U63promfwd                        | CGTTTTTAATAAAATACATTGCATAGATCTGAATTCCTTTTTTGCTCACCTGTGATTGCTC                                                                         |
| U63promrev                        | TATTTTAACTTGCTATTTCTAGCTCTAAACAGGCTTCTCGAAGACCCCGAGCTTAAATGAAAATAGGTTCT                                                               |
| gRNAtermfwd                       | GGGTCTTCGAGAAGACCTGTTTTAGAGCTAGAAATAGCA                                                                                               |
| gRNAtermrev                       | ACACCACAAATATACTGTTGCCGAGCACAATGTCTAGAAATGCATACGCATTAAGCGAAC                                                                          |
| pCFD4fwd                          | ATATATAGGAAAGATATCCGGGTGAACCTTCGGGGTCTTCGAGAAGACCTGTTTTAGAGCTAGAAAATAGCAAG                                                            |
| pCFD4rev                          | TATTTTAACTTGCTATTTCTAGCTCTAAACAGGCTTCTCGAAGACCCCGAGCTTAAATGAAAATAGGTTCT                                                               |
| gRNA target sites                 |                                                                                                                                       |
| gRNA-y target                     | GCGATATAGTTGGAGCCAGC                                                                                                                  |
| gRNA-e target                     | GCCACAATTGTCGATCGTCA                                                                                                                  |
| gRNA-y offset top                 | CAAGGATCCACCCTTTGTCC                                                                                                                  |
| gRNA-y offset bottom              | TCACCTTGGTGACGCGCTCT                                                                                                                  |
| gRNA-wg                           | GCAGCAGTCTCAGCCAAGTCC                                                                                                                 |
| gRNA-wls                          | GACCATACTGGAGAACCTGAG                                                                                                                 |
| gRNA-wgP <sup>1-3</sup>           | GCGATCGGATCGGGGATCTC                                                                                                                  |
| gRNA-wgP <sup>1-3</sup>           | GCTGCTGACAAACGCGAGGT                                                                                                                  |
| gRNA-wgP <sup>1-3</sup>           | GCAGCTGCAATGCAGGAGTC                                                                                                                  |
| gRNA-cu                           | AGCCGGGGTGCCTTAGACCGG                                                                                                                 |
| HDR donor                         |                                                                                                                                       |
| Ebony HDR donor                   | AAAGTATCCCCACAGTTAATATATCTTCAAGATGGGTTGCTGCCACAATTGTCGATCGagtaaagatctTCAAGGGTCTGCAGCA<br>AGACTTCGTGCCTAGAGCTCTGCACCGCATCTTCGAGGAGCAGC |
| Wls HDR donor                     | AAACCAGTGAGCTCCAACCTTCGAGCAACCAAGATGTCGGGCACCATACTGGAGAACCCTGAGTGCCCGCAAGCTGTCCATATTGG<br>TGGCCACTTTGCTGCTCTGCCAGGTGTTGTGCTT          |
| HR donor plasmid and HR diagnosis |                                                                                                                                       |
| wgGFP5' fwd                       | AGGTCGACGGTATCGATAAGCTTGATATCGCGGAATGCCAAAGTGTGTGTTAAC                                                                                |
| wgGFP5' rev                       | CCTTCCGGATTTCTGTTTGCTTCGACTTGGCTGAGACT                                                                                                |
| wgGFP3' fwd                       | ATCGCCTCGAAGCCAAAGGGCGCTTCGGTTCGTGCATCCATGTGGTGGTAAGTTCATTGAA                                                                         |
| wgGFP3' rev                       | GGAGCTCCACCGCGGTGGCGCCGCTCTAGGGCGGTATACGTCAAATGCCCAGC                                                                                 |
| wgGFPGFPfwd                       | CAAGTCGAAGGCAACAGAAATCCGGAAGGATCGCCTCGAAGCCAAAGGG                                                                                     |
| wgGFPGFPrev                       | TGCACGAACCGAGCGCCCTTTGGCTTCGAGGCGATCTTGTACAGCTCGTCCATGCCGAGA                                                                          |
| IgG2 linker                       | ATCGCCTCGAAGCCAAAGGGCGCTTCGGTTCGTGCA                                                                                                  |
| wg_genotyping_fwd1                | GAAGCGCCCAAGCAATGGATGAGG                                                                                                              |
| wg_genotyping_rev1                | CTCGCCCTTGCTCACCATAGATC                                                                                                               |
| wg_genotyping_fwd2                | CTCGCATGGACGAGCTGTACAAG                                                                                                               |
| wg_genotyping_rev2                | TCGCTGGGTCCATGTACATGATGGG                                                                                                             |

**Table S6. Additional fly stocks used in this study**

| Stock                                                                               | Source                                                                                                     |
|-------------------------------------------------------------------------------------|------------------------------------------------------------------------------------------------------------|
| Stocks used to generate cas9 lines                                                  |                                                                                                            |
| <i>y[1] w[67c23] P{y[+t7.7]=nos-phiC31int.NLS}X; P{y[+t7.7]=CaryP}attP2</i>         | Gift from Simon Collier, University of Cambridge, Cambridge, UK                                            |
| <i>y[1] M{3xP3-RFP.attP}ZH-2A w[*]; M{vas-int.Dm}ZH-102D</i>                        | Bloomington (BL: 24480)                                                                                    |
| Stocks used to generate gRNA lines                                                  |                                                                                                            |
| <i>y[1] v[1] P{y[+t7.7]=nos-phiC31int.NLS}X; P{y[+t7.7]=CaryP}attP40</i>            | Bloomington (BL: 24709)                                                                                    |
| <i>y[1] sc[1] v[1] P{y[+t7.7]=nos-phiC31int.NLS}X; P{y[+t7.7]=CaryP}attP2</i>       | Bloomington (BL: 25710)                                                                                    |
| Balancer and marker stocks:                                                         |                                                                                                            |
| <i>P{ry[+t7.2]=hsFLP}1, y[1] w[1118]; Sp/CyO</i>                                    | S.L.B. laboratory stock                                                                                    |
| <i>P{ry[+t7.2]=hsFLP}1, y[1] w[1118];; MKRS/TM6b e</i>                              | S.L.B. laboratory stock                                                                                    |
| <i>w[1118];; TM3 e/TM6b e</i>                                                       | S.L.B. laboratory stock                                                                                    |
| <i>w[1118], f[1]</i>                                                                | S.L.B. laboratory stock                                                                                    |
| Gal4 lines                                                                          |                                                                                                            |
| <i>P{ry[+t7.2]=hsFLP}1, y[1] w[1118]; engrailed-Gal4 tubulin-Gal80<sup>ts</sup></i> | Gift from Ryohei Yagi and Konrad Basler, University of Zurich, Zurich                                      |
| <i>UAS-CD8:GFP/CyO; MKRS/TM6b</i>                                                   | Gift from Katja Röper, Medical Research Council                                                            |
| <i>w[1118];; P{GAL4::VP16-nos.UTR}CG6325<sup>MVD1</sup></i>                         | Laboratory of Molecular Biology, Cambridge, UK                                                             |
| Cas9 lines from flyCRISPR                                                           |                                                                                                            |
| <i>y[1] M{vas-cas9}ZH-2A w[1118]/FM7c</i>                                           | Bloomington (BL: 51323)                                                                                    |
| <i>w[1118]; PBac{y[+mDint2]=vas-cas9}VK00027</i>                                    | Bloomington (BL: 51423)                                                                                    |
| wg loss-of-function stock used for genetic complementation                          |                                                                                                            |
| <i>w[1118]; wg<sup>TX-Cherry</sup>/CyO</i>                                          | Gift from Jean-Paul Vincent, Medical Research Council National Institute for Medical Research, London (13) |
